# Supplementary material for: Microbial Community Cohesion Mediates Community Turnover in Unperturbed Aquifers
Source: PubMed Central journal article supplement (PMC6030547; doi:10.1128/msystems.00066-18), 2018-07-03

Athens

Greene

Licking

0.3 Threshold

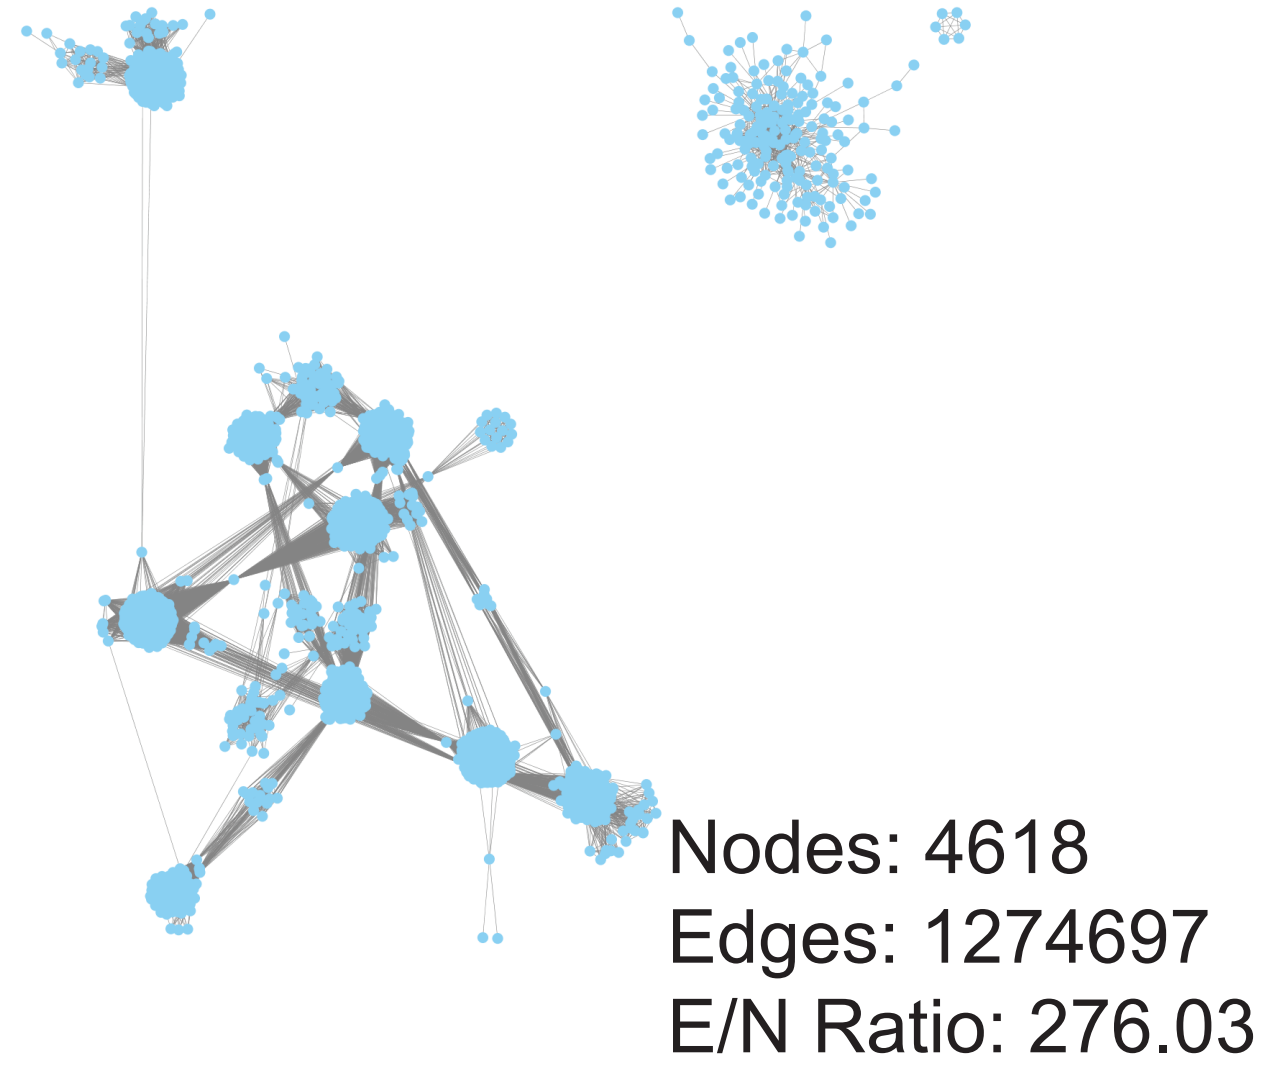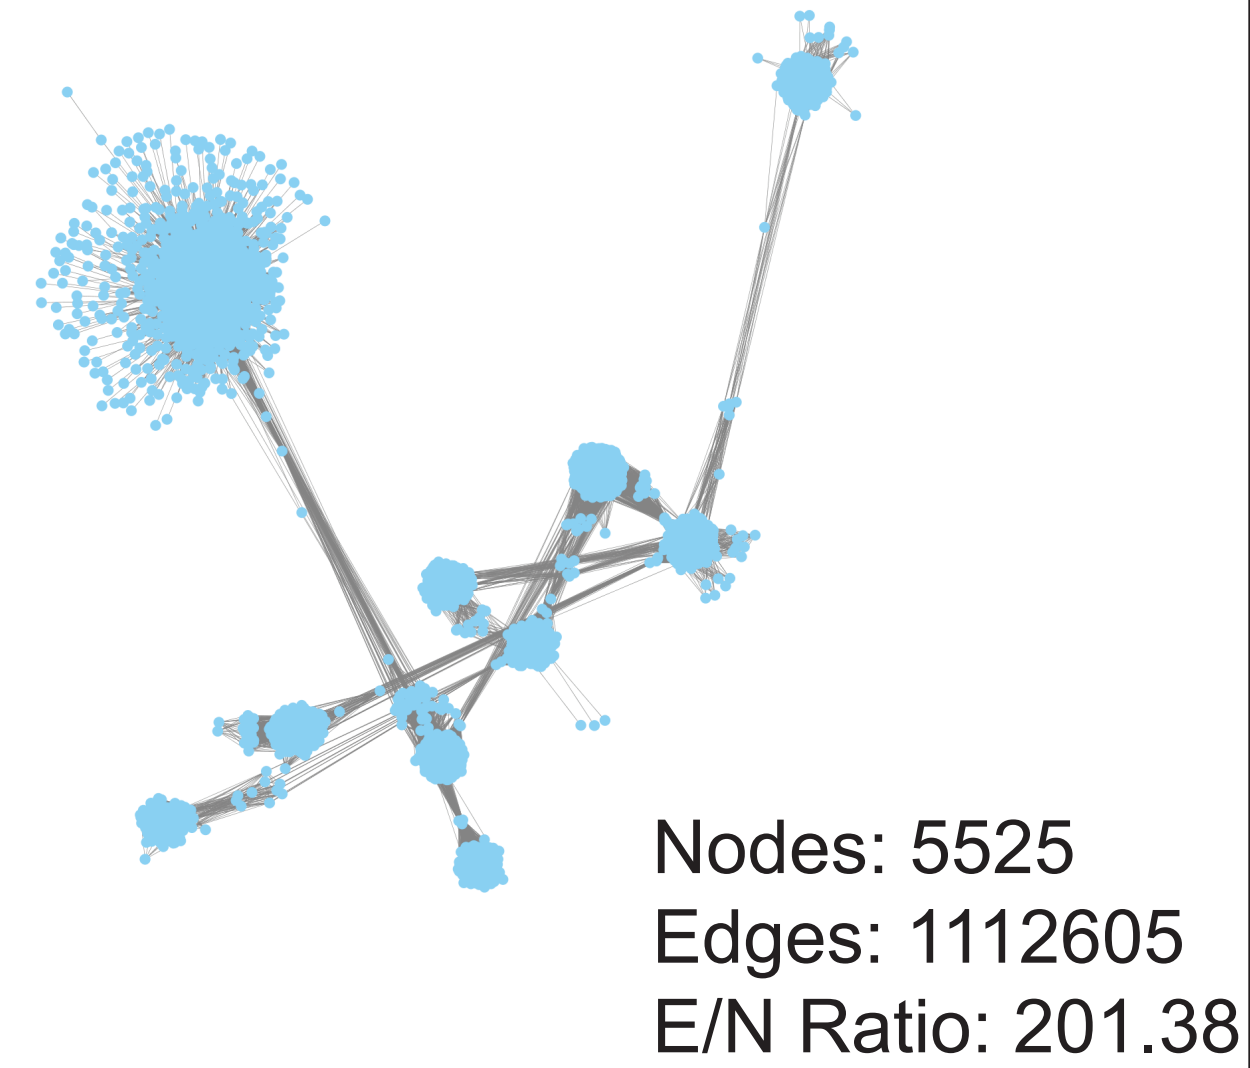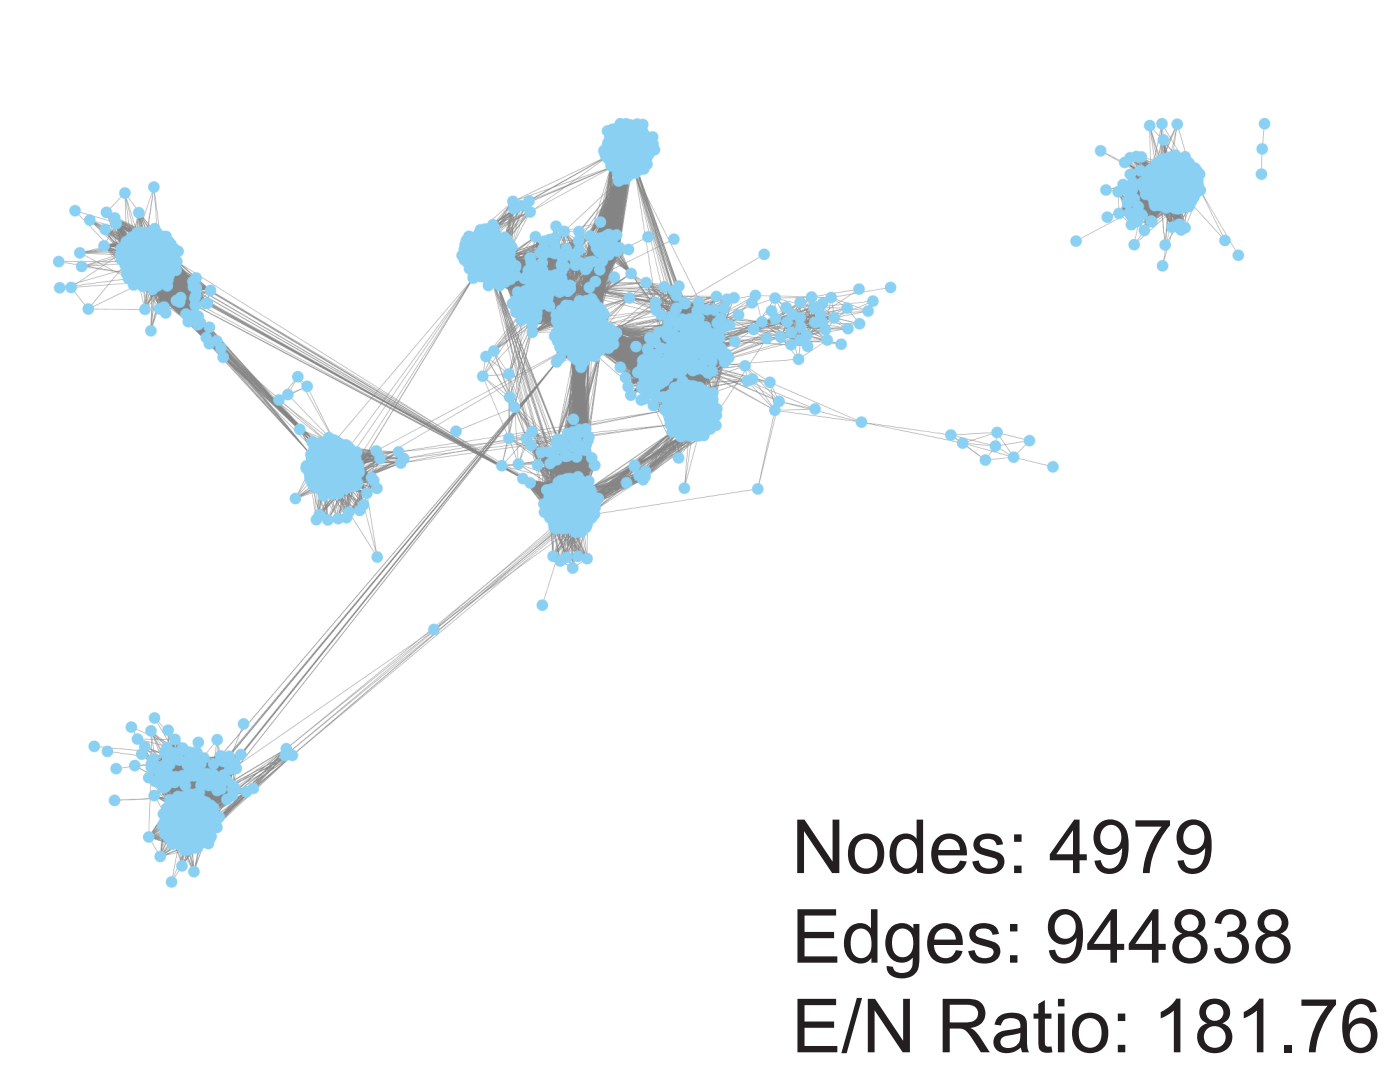

0.5 Threshold

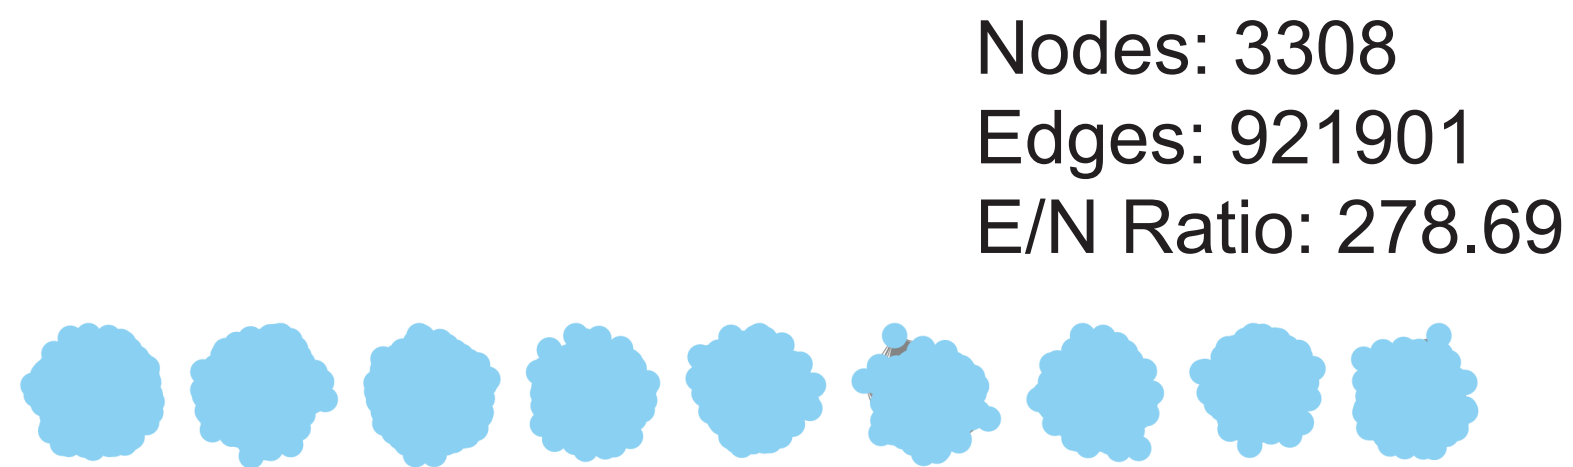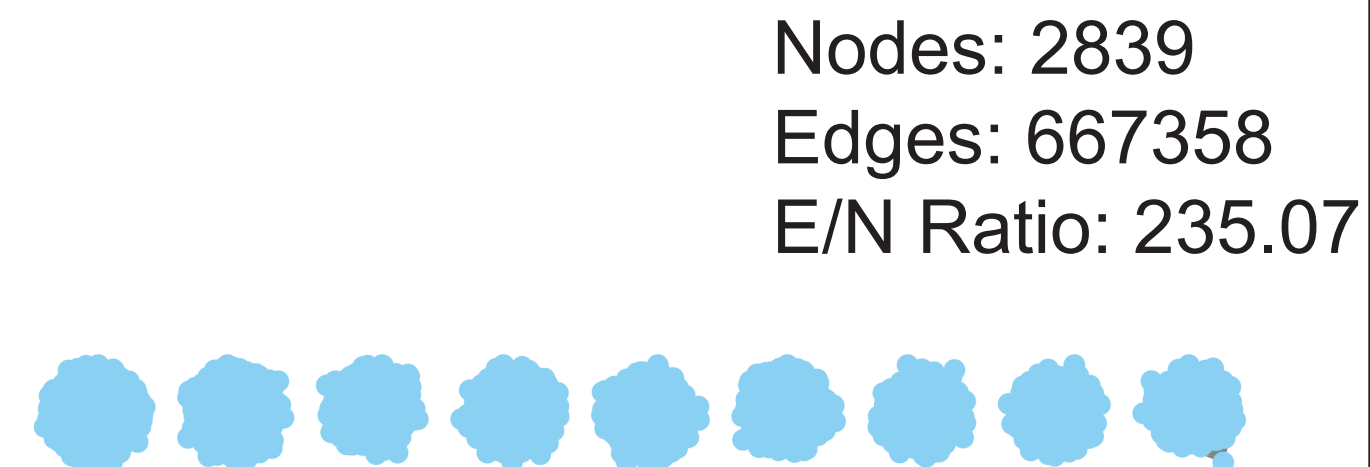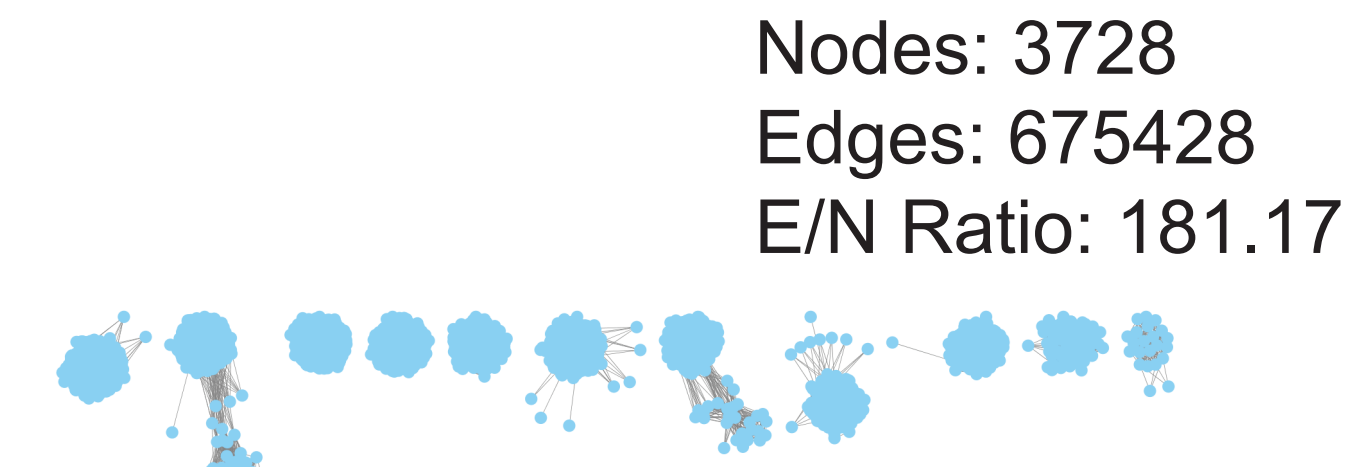

Supplement: sys004182243sf4.pdf [file sys004182243sf4.pdf]
